# Supplementary material for: Factors Influencing the Rheology of Methane Foam for Gas Mobility Control in High-Temperature, Proppant-Fractured Reservoirs
Source: MDPI journal article supplement (doi:10.3390/colloids8010013), 2024-02-04
Supplement: s1 [file s1]

# **Factors Influencing the Rheology of Methane Foam for Gas Mobility Control in High-Temperature, Proppant-Fractured Reservoirs**

*Aashish T. Parekh<sup>α</sup>, Amit Katiyar<sup>β</sup>, and Quoc P. Nguyen<sup>\*α</sup>*

<sup>α</sup> Hildebrand Department of Petroleum and Geosystems Engineering, The University of Texas  
at Austin, 200 E. Dean Keeton Stop C0300, Austin, TX 78712-1585

<sup>β</sup> The Dow Chemical Company, 230 Abner Jackson Pkwy/ECB/2A218, Lake Jackson, TX 77566

\* Email: quoc\_p\_nguyen@mail.utexas.edu

## Supporting Information

### *Pressure Trends of Previously Tested Foaming Surfactants*

This system was previously used to complete flood evaluation with two anionic surfactants: Surfactant A and Surfactant B. These floods were completed in the same pack as the other surfactant formulations discussed in this paper: a stainless-steel column 1 foot in length and 1 inch in diameter packed with Ottawa, white sand sieved to 30/50-mesh. The presented data was for floods at a temperature of 388 K, a total flow rate of 0.0141 cm/s, and an FQ of 90%. The 5-wt% surfactant solutions were made using the same 30,000-ppm brine and co-injected with methane into a proppant pack free of oil. It can be seen in Figure S1 below that Surfactant A exhibits no dependence of foam viscosity on system pressure, while Surfactant B shows an increase in foam viscosity with system pressure.

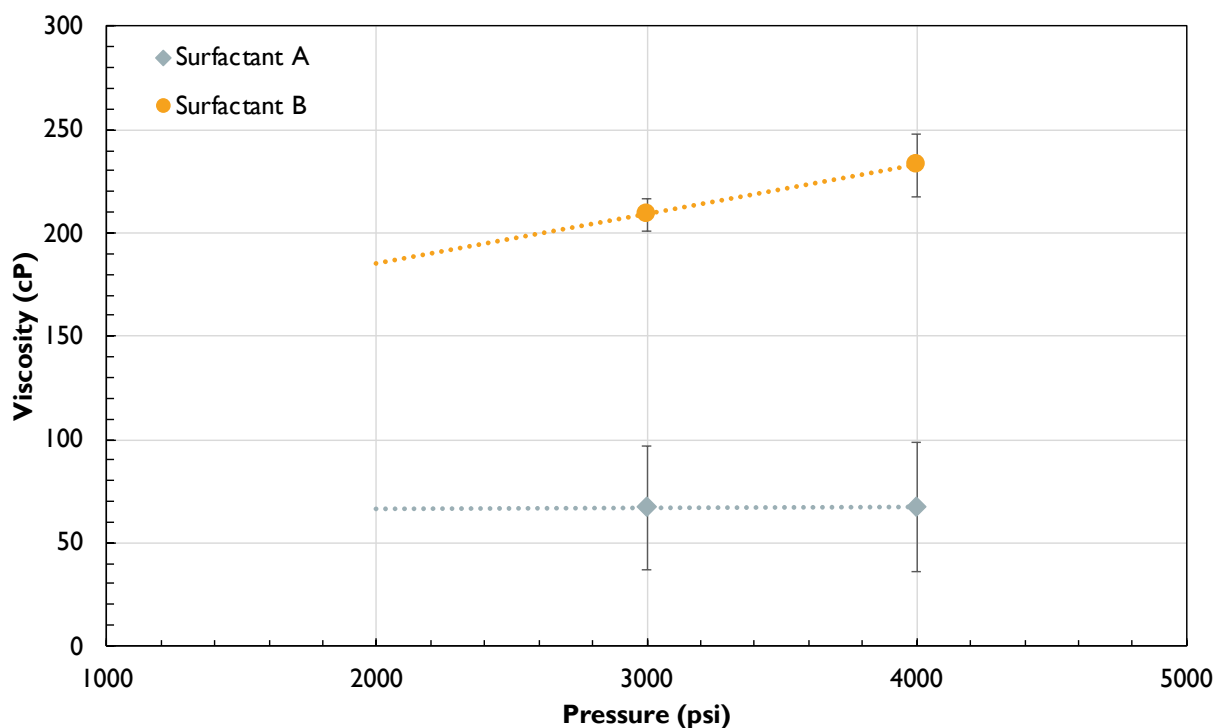

**Figure S1.** Pressure sensitivity analysis for Surfactant A and Surfactant B
